# Supplementary material
Source: PubMed Central journal article supplement (PMC4640734)
Supplement: pnas.1503205112.sd01.pdf [file pnas.1503205112.sd01.pdf]

**Dataset S1.** List of plant material used in the present study. Herbarium acronyms follow Index Herbariorum (<http://sweetgum.nybg.org/ih/>).

| Accession       | Herbarium | Country  | Province   | Region          | locality     | haplotype | Latitude | Longitude |
|-----------------|-----------|----------|------------|-----------------|--------------|-----------|----------|-----------|
| FBRSP0000269411 | DGU       | Cambodia | Mondolkiri | Sen Monorom     |              | cp20A     | 12.5135  | 107.2528  |
| BQUCH0033       |           | Chile    | Rapa Nui   | Rano Raraku     |              | cp17A     | -27.1422 | -109.4335 |
| BQUCH0036       |           | Chile    | Rapa Nui   | Aratataki Rereo |              | cp17A     | -27.1212 | -109.4013 |
| BQUCH0038       |           | Chile    | Rapa Nui   | Hanga Oteo      |              | cp17A     | -27.1432 | -109.4239 |
| BQUCH0238       |           | Chile    | Rapa Nui   | Hanga Roa       |              | cp17A     | -27.1499 | -109.4337 |
| Skottsberg 670  | NY, US    | Chile    | Rapa Nui   |                 |              | cp17C     | -27.1540 | -109.4213 |
| China_Shanghai1 |           | China    | Shanghai   | Xuhui           |              | cp01A     | 31.1928  | 121.4382  |
| China_Shanghai3 |           | China    | Shanghai   | Xuhui           |              | cp01A     | 31.1929  | 121.4382  |
| China_Shanghai4 |           | China    | Shanghai   | Xuhui           |              | cp01A     | 31.1930  | 121.4382  |
| Chung 1725_1    | HAST      | China    | Fujian     | Longyan         | Liancheng    | cp01A     | 25.6381  | 116.7246  |
| Chung 1725_3    | HAST      | China    | Fujian     | Longyan         | Liancheng    | cp01A     | 25.6381  | 116.7246  |
| Chung 1725_6    | HAST      | China    | Fujian     | Longyan         | Liancheng    | cp01A     | 25.6381  | 116.7246  |
| Chung 1728_1    | HAST      | China    | Guangdong  | Meizhou         | Meih sien    | cp01B     | 24.3525  | 116.0991  |
| Chung 1728_2    | HAST      | China    | Guangdong  | Meizhou         | Meih sien    | cp01B     | 24.3526  | 116.0991  |
| Chung 1728_3    | HAST      | China    | Guangdong  | Meizhou         | Meih sien    | cp01B     | 24.3527  | 116.0991  |
| Chung 1728_4    | HAST      | China    | Guangdong  | Meizhou         | Meih sien    | cp01B     | 24.3528  | 116.0991  |
| Chung 1728_5    | HAST      | China    | Guangdong  | Meizhou         | Meih sien    | cp01B     | 24.3529  | 116.0991  |
| Chung 1736-1    | HAST      | China    | Guangdong  | Huizhou         | Boluo        | cp01C     | 23.1788  | 113.9756  |
| Chung 1736-2    | HAST      | China    | Guangdong  | Huizhou         | Boluo        | cp01C     | 23.1789  | 113.9756  |
| Chung 1736-3    | HAST      | China    | Guangdong  | Huizhou         | Boluo        | cp01C     | 23.1790  | 113.9756  |
| Chung 1766-1    | HAST      | China    | Guangdong  | Shaoguan        | Ruyuan       | cp01C     | 24.9455  | 113.0952  |
| Chung 1766-2    | HAST      | China    | Guangdong  | Shaoguan        | Ruyuan       | cp01C     | 24.9456  | 113.0952  |
| Chung 1766-3    | HAST      | China    | Guangdong  | Shaoguan        | Ruyuan       | cp01C     | 24.9457  | 113.0952  |
| Chung 1766-4    | HAST      | China    | Guangdong  | Shaoguan        | Ruyuan       | cp01C     | 24.9458  | 113.0952  |
| Chung 1766-5    | HAST      | China    | Guangdong  | Shaoguan        | Ruyuan       | cp01C     | 24.9459  | 113.0952  |
| Chung 1726_4    | HAST      | China    | Fujian     | Longyan         | Pengkou zhen | cp01C     | 25.4537  | 116.6705  |
| Chung 2411      | HAST      | China    | Fujian     | Fuzhou          |              | cp01C     | 26.0873  | 119.2291  |
| Chung 2412      | HAST      | China    | Fujian     | Fuzhou          |              | cp01C     | 26.0873  | 119.2291  |
| Chung 2413      | HAST      | China    | Fujian     | Fuzhou          |              | cp01C     | 26.0873  | 119.2291  |
| Chung 2414      | HAST      | China    | Fujian     | Fuzhou          |              | cp01C     | 26.0873  | 119.2291  |

|                |      |       |           |               |                  |       |         |          |
|----------------|------|-------|-----------|---------------|------------------|-------|---------|----------|
| Chung 2415     | HAST | China | Fujian    | Fuzhou        |                  | cp01C | 26.0873 | 119.2291 |
| Barchet s.n.   | US   | China | Zhejiang  |               |                  | cp01D | 30.2556 | 120.1648 |
| China_yn17     | HAST | China | Yunnan    | Pu'er         | Menglian         | cp20A | 22.3330 | 99.6609  |
| China_yn18     | HAST | China | Yunnan    | Pu'er         | Menglian         | cp20A | 22.3331 | 99.6609  |
| China_yn19     | HAST | China | Yunnan    | Pu'er         | Menglian         | cp20A | 22.3332 | 99.6609  |
| China_yn31     | HAST | China | Yunnan    | Xishuangbanna | Mengla           | cp20A | 21.9281 | 101.2570 |
| Chung 1724-1   | HAST | China | Fujian    | Nanping       | Yanping District | cp20A | 26.6831 | 118.1846 |
| Chung 1724-2   | HAST | China | Fujian    | Nanping       | Yanping District | cp20A | 26.6832 | 118.1846 |
| Chung 1724-3   | HAST | China | Fujian    | Nanping       | Yanping District | cp20A | 26.6833 | 118.1846 |
| Chung 1724-4   | HAST | China | Fujian    | Nanping       | Yanping District | cp20A | 26.6834 | 118.1846 |
| Chung 1724-5   | HAST | China | Fujian    | Nanping       | Yanping District | cp20A | 26.6835 | 118.1846 |
| Chung 1743-1   | HAST | China | Guangdong | Shaoguan      | Qujiang          | cp20A | 24.6746 | 113.5803 |
| Chung 1747-1   | HAST | China | Guangdong | Shaoguan      | Ruyuan           | cp20A | 24.7793 | 113.3210 |
| Chung 1747-2_a | HAST | China | Guangdong | Shaoguan      | Ruyuan           | cp20A | 24.7794 | 113.3210 |
| Chung 1747-3   | HAST | China | Guangdong | Shaoguan      | Ruyuan           | cp20A | 24.7795 | 113.3210 |
| Chung 1749-2   | HAST | China | Guangdong | Shaoguan      | Ruyuan           | cp20A | 24.9480 | 113.4199 |
| Chung 1750-4   | HAST | China | Guangdong | Shaoguan      | Lechang          | cp20A | 25.1127 | 113.3663 |
| Chung 1752-1   | HAST | China | Guangdong | Shaoguan      | Ruyuan           | cp20A | 25.1116 | 113.3405 |
| Chung 1753-1   | HAST | China | Guangdong | Shaoguan      | Renhua           | cp20A | 25.0734 | 113.6074 |
| Chung 1753-3   | HAST | China | Guangdong | Shaoguan      | Renhua           | cp20A | 25.0733 | 113.6074 |
| Chung 1754_1   | HAST | China | Guangdong | Shaoguan      | Renhua           | cp20A | 25.0835 | 113.6514 |
| Chung 1754_3   | HAST | China | Guangdong | Shaoguan      | Renhua           | cp20A | 25.0834 | 113.6514 |
| Chung 1847     | HAST | China | Guangxi   | Hezhou        | Babu             | cp20A | 24.4043 | 111.5437 |
| Chung 1849-2_a | HAST | China | Guangxi   | Guilin        | Pingle           | cp20A | 24.5026 | 110.8364 |
| Chung 1912-1   | HAST | China | Yunnan    | Honghe        | Yuanyang         | cp20A | 23.2147 | 102.8456 |
| CSC-hainam     | TNM  | China | Hainan    | Wuzhishan     |                  | cp20A | -1.8787 | 120.2447 |
| Peng 22923_1   | HAST | China | Guangxi   | Chongzuo      | Longzhou         | cp20A | 22.4917 | 106.9363 |
| Peng 22923_2   | HAST | China | Guangxi   | Chongzuo      | Longzhou         | cp20A | 22.4916 | 106.9363 |
| Qu 23506       | MO   | China | Yunnan    |               |                  | cp20A | 24.8656 | 98.8972  |
| Chung 1743-3   | HAST | China | Guangdong | Shaoguan      | Qujiang          | cp20B | 24.6748 | 113.5803 |
| Chung 1743-4   | HAST | China | Guangdong | Shaoguan      | Qujiang          | cp20B | 24.6749 | 113.5803 |
| Chung 1743-5   | HAST | China | Guangdong | Shaoguan      | Qujiang          | cp20B | 24.6750 | 113.5803 |

|                |      |       |           |           |           |       |         |          |
|----------------|------|-------|-----------|-----------|-----------|-------|---------|----------|
| Chung 1750-1   | HAST | China | Guangdong | Shaoguan  | Lechang   | cp20B | 25.1124 | 113.3663 |
| Chung 1750-2   | HAST | China | Guangdong | Shaoguan  | Lechang   | cp20B | 25.1125 | 113.3663 |
| Chung 1750-3   | HAST | China | Guangdong | Shaoguan  | Lechang   | cp20B | 25.1126 | 113.3663 |
| Chung 1768-1   | HAST | China | Guangdong | Qingyuan  | Fogang    | cp20B | 23.6473 | 113.1608 |
| Chung 1768-2   | HAST | China | Guangdong | Qingyuan  | Fogang    | cp20B | 23.6474 | 113.1608 |
| Chung 1768-3   | HAST | China | Guangdong | Qingyuan  | Fogang    | cp20B | 23.6475 | 113.1608 |
| Chung 1768-4   | HAST | China | Guangdong | Qingyuan  | Fogang    | cp20B | 23.6476 | 113.1608 |
| Chung 1768-5   | HAST | China | Guangdong | Qingyuan  | Fogang    | cp20B | 23.6477 | 113.1608 |
| Chung 1749-1   | HAST | China | Guangdong | Shaoguan  | Ruyuan    | cp20C | 24.9479 | 113.4199 |
| Chung 1749-5_a | HAST | China | Guangdong | Shaoguan  | Ruyuan    | cp20C | 24.9482 | 113.4199 |
| Chung 1749-3   | HAST | China | Guangdong | Shaoguan  | Ruyuan    | cp20E | 24.9481 | 113.4199 |
| Chung 1752-3   | HAST | China | Guangdong | Shaoguan  | Ruyuan    | cp20E | 25.1115 | 113.3405 |
| Chung 1922-1   | HAST | China | Yunnan    | Honghe    | Mile      | cp20F | 24.4773 | 103.4191 |
| Chung 1922-2   | HAST | China | Yunnan    | Honghe    | Mile      | cp20F | 24.4772 | 103.4191 |
| China_yn01     | TNM  | China | Yunnan    | Pu'er     | Lancang   | cp21A | 22.2882 | 100.5781 |
| China_yn02     | TNM  | China | Yunnan    | Pu'er     | Lancang   | cp21A | 22.2882 | 100.5781 |
| China_yn03     | TNM  | China | Yunnan    | Pu'er     | Lancang   | cp21A | 22.2880 | 100.5781 |
| Chung 1735-2   | HAST | China | Guangdong | Huizhou   | Huicheng  | cp21A | 23.1996 | 114.3674 |
| Chung 1735-3   | HAST | China | Guangdong | Huizhou   | Huicheng  | cp21A | 23.1997 | 114.3674 |
| Chung 1735-4   | HAST | China | Guangdong | Huizhou   | Huicheng  | cp21A | 23.1998 | 114.3674 |
| Chung 1737-2   | HAST | China | Guangdong | Guangzhou | Zengcheng | cp21A | 23.1933 | 113.6751 |
| Chung 1737-3   | HAST | China | Guangdong | Guangzhou | Zengcheng | cp21A | 23.1932 | 113.6751 |
| Chung 1737-4   | HAST | China | Guangdong | Guangzhou | Zengcheng | cp21A | 23.1934 | 113.6751 |
| Chung 1739-1   | HAST | China | Guangdong | Guangzhou | Baiyun    | cp21A | 23.3649 | 113.4127 |
| Chung 1739-2   | HAST | China | Guangdong | Guangzhou | Baiyun    | cp21A | 23.3650 | 113.4127 |
| Chung 1739-3   | HAST | China | Guangdong | Guangzhou | Baiyun    | cp21A | 23.3651 | 113.4127 |
| Chung 1740-1   | HAST | China | Guangdong | Guangzhou | Conghua   | cp21A | 23.6834 | 113.4512 |
| Chung 1740-2   | HAST | China | Guangdong | Guangzhou | Conghua   | cp21A | 23.6835 | 113.4512 |
| Chung 1740-3   | HAST | China | Guangdong | Guangzhou | Conghua   | cp21A | 23.6836 | 113.4512 |
| Chung 1740-4   | HAST | China | Guangdong | Guangzhou | Conghua   | cp21A | 23.6837 | 113.4512 |
| Chung 1740-5   | HAST | China | Guangdong | Guangzhou | Conghua   | cp21A | 23.6838 | 113.4512 |
| Chung 1740-6   | HAST | China | Guangdong | Guangzhou | Conghua   | cp21A | 23.6839 | 113.4512 |

|                |      |       |           |           |           |       |         |          |
|----------------|------|-------|-----------|-----------|-----------|-------|---------|----------|
| Chung 1743-2   | HAST | China | Guangdong | Shaoguan  | Qujiang   | cp21A | 24.6747 | 113.5803 |
| Chung 1769-1   | HAST | China | Guangdong | Guangzhou | Huadu     | cp21A | 23.4779 | 113.1240 |
| Chung 1769-2   | HAST | China | Guangdong | Guangzhou | Huadu     | cp21A | 23.4780 | 113.1240 |
| Chung 1769-3   | HAST | China | Guangdong | Guangzhou | Huadu     | cp21A | 23.4781 | 113.1240 |
| Chung 1769-4   | HAST | China | Guangdong | Guangzhou | Huadu     | cp21A | 23.4782 | 113.1240 |
| Chung 1769-5_a | HAST | China | Guangdong | Guangzhou | Huadu     | cp21A | 23.4783 | 113.1240 |
| Chung 1770-1   | HAST | China | Guangdong | Guangzhou | Baiyun    | cp21A | 23.3127 | 113.2014 |
| Chung 1770-2   | HAST | China | Guangdong | Guangzhou | Baiyun    | cp21A | 23.3131 | 113.2014 |
| Chung 1770-3   | HAST | China | Guangdong | Guangzhou | Baiyun    | cp21A | 23.3128 | 113.2014 |
| Chung 1770-4   | HAST | China | Guangdong | Guangzhou | Baiyun    | cp21A | 23.3129 | 113.2014 |
| Chung 1770-5   | HAST | China | Guangdong | Guangzhou | Baiyun    | cp21A | 23.3130 | 113.2014 |
| Chung 1775-1   | HAST | China | Guangdong | Jiangmen  | Pengjiang | cp21A | 22.6044 | 113.0016 |
| Chung 1775-2   | HAST | China | Guangdong | Jiangmen  | Pengjiang | cp21A | 22.6045 | 113.0016 |
| Chung 1775-4   | HAST | China | Guangdong | Jiangmen  | Pengjiang | cp21A | 22.6046 | 113.0016 |
| Chung 1775-5   | HAST | China | Guangdong | Jiangmen  | Pengjiang | cp21A | 22.6047 | 113.0016 |
| Chung 1777-1   | HAST | China | Guangdong | Zhongshan | Nanlang   | cp21A | 22.4464 | 113.5255 |
| Chung 1777-2   | HAST | China | Guangdong | Zhongshan | Nanlang   | cp21A | 22.4465 | 113.5255 |
| Chung 1779_1   | HAST | China | Guangdong | Guangzhou | Nansha    | cp21A | 22.7918 | 113.5053 |
| Chung 1779_2   | HAST | China | Guangdong | Guangzhou | Nansha    | cp21A | 22.7919 | 113.5053 |
| Chung 1779_3   | HAST | China | Guangdong | Guangzhou | Nansha    | cp21A | 22.7920 | 113.5053 |
| Chung 1779_4   | HAST | China | Guangdong | Guangzhou | Nansha    | cp21A | 22.7921 | 113.5053 |
| Chung 1779_5   | HAST | China | Guangdong | Guangzhou | Nansha    | cp21A | 22.7922 | 113.5053 |
| Chung 1780_1   | HAST | China | Guangdong | Dongguan  | Humen     | cp21A | 22.8392 | 113.6894 |
| Chung 1780_2   | HAST | China | Guangdong | Dongguan  | Humen     | cp21A | 22.8392 | 113.6894 |
| Chung 1780_3   | HAST | China | Guangdong | Dongguan  | Humen     | cp21A | 22.8392 | 113.6894 |
| Chung 1780_4   | HAST | China | Guangdong | Dongguan  | Humen     | cp21A | 22.8392 | 113.6894 |
| Chung 1782-1   | HAST | China | Guangdong | Guangzhou | Luogang   | cp21A | 23.1389 | 113.5423 |
| Chung 1782-2   | HAST | China | Guangdong | Guangzhou | Luogang   | cp21A | 23.1390 | 113.5423 |
| Chung 1782-3   | HAST | China | Guangdong | Guangzhou | Luogang   | cp21A | 23.1391 | 113.5423 |
| Chung 1782-4   | HAST | China | Guangdong | Guangzhou | Luogang   | cp21A | 23.1392 | 113.5423 |
| Chung 1782-5   | HAST | China | Guangdong | Guangzhou | Luogang   | cp21A | 23.1393 | 113.5423 |
| Chung 1854_a   | HAST | China | Guangxi   | Guilin    | Yangshuo  | cp21A | 24.7453 | 110.4189 |

|              |      |       |           |            |               |       |         |          |
|--------------|------|-------|-----------|------------|---------------|-------|---------|----------|
| Chung_1720   | HAST | China | Guangdong | Shanwei    | Lufeng City   | cp21A | 22.9617 | 115.6574 |
| Chung 1919-2 | HAST | China | Yunnan    | Honghe     | Pingbian      | cp21A | 22.9277 | 103.2996 |
| Chung 1919-5 | HAST | China | Yunnan    | Honghe     | Pingbian      | cp21A | 22.9280 | 103.2996 |
| Chung_1726_3 | HAST | China | Fujian    | Longyan    | Liancheng     | cp21A | 25.4537 | 116.6705 |
| Levine 1013  | US   | China | Guangdong | Guangzhou  | Honan Island  | cp21A | 21.0457 | 105.7974 |
| Peng 22596   | HAST | China | Sichuan   | Chengdu    | Dujiangyan    | cp21A | 31.0080 | 103.6077 |
| Peng 22606-1 | HAST | China | Sichuan   | Chengdu    | Wuhou         | cp21A | 30.6297 | 104.0717 |
| Zhu 409      | MO   | China | Sichuan   | Dujianyen  |               | cp21A | 30.9906 | 103.6323 |
| Zhu 87       | MO   | China | Sichuan   | Dujianyen  |               | cp21A | 30.9906 | 103.6323 |
| Chen 910756  | MO   | China | Gangshu   | Wen County |               | cp21B | 32.7784 | 105.1816 |
| Chung 1778_1 | HAST | China | Guangdong | Zhongshan  | Nanlang       | cp21C | 22.6803 | 113.4775 |
| Chung 1778_2 | HAST | China | Guangdong | Zhongshan  | Nanlang       | cp21C | 22.6804 | 113.4775 |
| Chung 1778_3 | HAST | China | Guangdong | Zhongshan  | Nanlang       | cp21C | 22.6805 | 113.4775 |
| Chung 1778_4 | HAST | China | Guangdong | Zhongshan  | Nanlang       | cp21C | 22.6806 | 113.4775 |
| Chung 1818   | HAST | China | Guangxi   | Liuzhou    | Liujiang      | cp21C | 24.3444 | 109.2128 |
| Chung 1912-2 | HAST | China | Yunnan    | Honghe     | Yuanyang      | cp21D | 23.2148 | 102.8456 |
| Chung 1721_1 | HAST | China | Fujian    | Nanping    | Jian'ou City  | cp22  | 27.0421 | 118.3467 |
| Chung 1721_2 | HAST | China | Fujian    | Nanping    | Jian'ou City  | cp22  | 27.0422 | 118.3467 |
| Chung 1721_3 | HAST | China | Fujian    | Nanping    | Jian'ou City  | cp22  | 27.0423 | 118.3467 |
| Chung 1721_4 | HAST | China | Fujian    | Nanping    | Jian'ou City  | cp22  | 27.0424 | 118.3467 |
| Chung 1721_5 | HAST | China | Fujian    | Nanping    | Jian'ou City  | cp22  | 27.0425 | 118.3467 |
| Chung 1722-2 | HAST | China | Fujian    | Nanping    | Wuyishan City | cp23  | 26.6886 | 117.9906 |
| Chung 1722-3 | HAST | China | Fujian    | Nanping    | Wuyishan City | cp23  | 26.6885 | 117.9906 |
| Chung 1722-4 | HAST | China | Fujian    | Nanping    | Wuyishan City | cp23  | 26.6884 | 117.9906 |
| Chung 1729_1 | HAST | China | Guangdong | Meizhou    | Xingning      | cp24  | 24.1074 | 115.7567 |
| Chung 1729_2 | HAST | China | Guangdong | Meizhou    | Xingning      | cp24  | 24.1075 | 115.7567 |
| Chung 1729_3 | HAST | China | Guangdong | Meizhou    | Xingning      | cp24  | 24.1076 | 115.7567 |
| Chung 1729_4 | HAST | China | Guangdong | Meizhou    | Xingning      | cp24  | 24.1077 | 115.7567 |
| Chung 1729_5 | HAST | China | Guangdong | Meizhou    | Xingning      | cp24  | 24.1078 | 115.7567 |
| Chung 1730_2 | HAST | China | Guangdong | Heyuan     | Dongyuan      | cp25  | 23.7891 | 114.6846 |
| Chung 1730_3 | HAST | China | Guangdong | Heyuan     | Dongyuan      | cp25  | 23.7892 | 114.6846 |
| Chung 1730_4 | HAST | China | Guangdong | Heyuan     | Dongyuan      | cp25  | 23.7893 | 114.6846 |

|                |      |       |           |               |           |       |         |          |
|----------------|------|-------|-----------|---------------|-----------|-------|---------|----------|
| Chung 1730_5   | HAST | China | Guangdong | Heyuan        | Dongyuan  | cp25  | 23.7894 | 114.6846 |
| Chung 1735-1   | HAST | China | Guangdong | Huizhou       | Huicheng  | cp26  | 23.1995 | 114.3674 |
| Chung 1741-1   | HAST | China | Guangdong | Qingyuan      | Yingde    | cp27  | 24.1554 | 113.6593 |
| Chung 1741-2   | HAST | China | Guangdong | Qingyuan      | Yingde    | cp27  | 24.1555 | 113.6593 |
| Chung 1741-3   | HAST | China | Guangdong | Qingyuan      | Yingde    | cp27  | 24.1556 | 113.6593 |
| Chung 1741-4   | HAST | China | Guangdong | Qingyuan      | Yingde    | cp27  | 24.1557 | 113.6593 |
| Chung 1741-5   | HAST | China | Guangdong | Qingyuan      | Yingde    | cp27  | 24.1558 | 113.6593 |
| Chung 1741-6   | HAST | China | Guangdong | Qingyuan      | Yingde    | cp27  | 24.1559 | 113.6593 |
| Chung 1742-1_a | HAST | China | Guangdong | Shaoguan      | Wengyuan  | cp27  | 24.4824 | 113.7840 |
| Chung 1742-2   | HAST | China | Guangdong | Shaoguan      | Wengyuan  | cp27  | 24.4825 | 113.7840 |
| Chung 1742-3_a | HAST | China | Guangdong | Shaoguan      | Wengyuan  | cp27  | 24.4826 | 113.7840 |
| Chung 1742-4_a | HAST | China | Guangdong | Shaoguan      | Wengyuan  | cp27  | 24.4827 | 113.7840 |
| Chung 1742-5   | HAST | China | Guangdong | Shaoguan      | Wengyuan  | cp27  | 24.4828 | 113.7840 |
| Chung 1776     | HAST | China | Guangdong | Zhongshan     | Nanlang   | cp28  | 22.4558 | 113.5478 |
| Chung 1781-1   | HAST | China | Guangdong | Dongguan      | Humen     | cp29  | 22.8786 | 113.6714 |
| Chung 1781-2   | HAST | China | Guangdong | Dongguan      | Humen     | cp29  | 22.8787 | 113.6714 |
| Chung 1781-3   | HAST | China | Guangdong | Dongguan      | Humen     | cp29  | 22.8788 | 113.6714 |
| Chung 1781-4   | HAST | China | Guangdong | Dongguan      | Humen     | cp29  | 22.8789 | 113.6714 |
| Chung 1781-5   | HAST | China | Guangdong | Dongguan      | Humen     | cp29  | 22.8790 | 113.6714 |
| Chung_1725_5   | HAST | China | Fujian    | Longyan       | Liancheng | cp29  | 25.6381 | 116.7246 |
| Chung 1837     | HAST | China | Guangdong | Qingyuan      | Yangshan  | cp30  | 24.6603 | 112.7506 |
| Chung 1838     | HAST | China | Guangdong | Qingyuan      | Yangshan  | cp31  | 24.6602 | 112.7673 |
| Chung 1856-1   | HAST | China | Guangxi   | Guilin        | Lipu      | cp32  | 24.6264 | 110.3908 |
| Chung 1856-3   | HAST | China | Guangxi   | Guilin        | Lipu      | cp32  | 24.6265 | 110.3908 |
| China_yn44     |      | China | Yunnan    | Kunming       | Wuhua     | cp33A | 25.0562 | 102.7013 |
| China_yn45     |      | China | Yunnan    | Kunming       | Wuhua     | cp33A | 25.0552 | 102.7020 |
| China_yn46     |      | China | Yunnan    | Kunming       | Wuhua     | cp33A | 25.0551 | 102.7020 |
| Chung 1911-1   | HAST | China | Yunnan    | Honghe        | Shiping   | cp33B | 23.8793 | 102.1653 |
| Chung 1911-2   | HAST | China | Yunnan    | Honghe        | Shiping   | cp33B | 23.8794 | 102.1653 |
| China_yn32     |      | China | Yunnan    | Xishuangbanna | Mengla    | cp34A | 21.9264 | 101.2557 |
| Chung 1913-1   | HAST | China | Yunnan    | Honghe        | Yuanyang  | cp34A | 23.2100 | 102.7560 |
| Chung 1913-2   | HAST | China | Yunnan    | Honghe        | Yuanyang  | cp34A | 23.2101 | 102.7560 |

|                |      |       |         |          |          |       |         |          |
|----------------|------|-------|---------|----------|----------|-------|---------|----------|
| Chung 1913-4   | HAST | China | Yunnan  | Honghe   | Yuanyang | cp34A | 23.2102 | 102.7560 |
| Chung 1914     | HAST | China | Yunnan  | Honghe   | Gejiu    | cp34A | 23.1174 | 103.2909 |
| Chung 1918-1   | HAST | China | Yunnan  | Honghe   | Yuanyang | cp34A | 23.1172 | 103.2908 |
| Chung 1918-2   | HAST | China | Yunnan  | Honghe   | Yuanyang | cp34A | 23.1173 | 103.2908 |
| Chung 1918-3   | HAST | China | Yunnan  | Honghe   | Yuanyang | cp34A | 23.1174 | 103.2908 |
| Chung 1919-1   | HAST | China | Yunnan  | Honghe   | Pingbian | cp34A | 22.9276 | 103.2996 |
| Chung 1919-3   | HAST | China | Yunnan  | Honghe   | Pingbian | cp34A | 22.9278 | 103.2996 |
| Chung 1919-4   | HAST | China | Yunnan  | Honghe   | Pingbian | cp34A | 22.9279 | 103.2996 |
| Chung 1920-1_a | HAST | China | Yunnan  | Honghe   | Hekou    | cp34A | 22.7466 | 103.9037 |
| Chung 1920-2   | HAST | China | Yunnan  | Honghe   | Hekou    | cp34A | 22.7467 | 103.9037 |
| Chung 1920-3   | HAST | China | Yunnan  | Honghe   | Hekou    | cp34A | 22.7468 | 103.9037 |
| Chung 1920-4   | HAST | China | Yunnan  | Honghe   | Hekou    | cp34A | 22.7469 | 103.9037 |
| Peng 22965_1   | HAST | China | Guangxi | Chongzuo | Longzhou | cp34A | 22.3958 | 106.7009 |
| Peng 22965_2   | HAST | China | Guangxi | Chongzuo | Longzhou | cp34A | 22.3959 | 106.7009 |
| Peng 22965_3   | HAST | China | Guangxi | Chongzuo | Longzhou | cp34A | 22.3960 | 106.7009 |
| China_yn04     |      | China | Yunnan  | Pu'er    | Ximeng   | cp35  | 22.6433 | 99.5896  |
| China_yn06     |      | China | Yunnan  | Pu'er    | Ximeng   | cp35  | 22.6396 | 99.5903  |
| China_yn07     |      | China | Yunnan  | Pu'er    | Ximeng   | cp35  | 22.6395 | 99.5903  |
| China_yn08     |      | China | Yunnan  | Pu'er    | Ximeng   | cp35  | 22.6394 | 99.5903  |
| China_yn09     |      | China | Yunnan  | Pu'er    | Ximeng   | cp35  | 22.6750 | 99.4873  |
| China_yn10     |      | China | Yunnan  | Pu'er    | Ximeng   | cp35  | 22.6751 | 99.4873  |
| China_yn11_a   |      | China | Yunnan  | Pu'er    | Ximeng   | cp35  | 22.6761 | 99.4882  |
| China_yn13     |      | China | Yunnan  | Pu'er    | Ximeng   | cp35  | 22.7006 | 99.5266  |
| China_yn14     |      | China | Yunnan  | Pu'er    | Ximeng   | cp35  | 22.7005 | 99.5266  |
| China_yn15     |      | China | Yunnan  | Pu'er    | Ximeng   | cp35  | 22.6563 | 99.6086  |
| China_yn16     |      | China | Yunnan  | Pu'er    | Ximeng   | cp35  | 22.6588 | 99.6036  |
| China_yn20     |      | China | Yunnan  | Pu'er    | Menglian | cp35  | 22.3333 | 99.6609  |
| China_yn24     |      | China | Yunnan  | Pu'er    | Lancang  | cp35  | 22.1634 | 100.0147 |
| China_yn25     |      | China | Yunnan  | Pu'er    | Lancang  | cp35  | 22.1633 | 100.0147 |
| China_yn26_a   |      | China | Yunnan  | Pu'er    | Lancang  | cp35  | 22.1604 | 100.0161 |
| China_yn27_a   |      | China | Yunnan  | Pu'er    | Lancang  | cp35  | 22.1605 | 100.0161 |
| China_yn28     |      | China | Yunnan  | Pu'er    | Lancang  | cp35  | 22.1474 | 100.0151 |

|                  |      |                  |                 |               |           |       |          |           |
|------------------|------|------------------|-----------------|---------------|-----------|-------|----------|-----------|
| China_yn30       |      | China            | Yunnan          | Pu'er         | Lancang   | cp35  | 22.1475  | 100.0150  |
| China_yn21_a     |      | China            | Yunnan          | Pu'er         | Lancang   | cp36A | 22.4609  | 100.0022  |
| China_yn23       |      | China            | Yunnan          | Pu'er         | Lancang   | cp36A | 22.4608  | 100.0022  |
| China_yn22       |      | China            | Yunnan          | Pu'er         | Lancang   | cp36B | 22.4610  | 100.0022  |
| China_yn36       |      | China            | Yunnan          | Xishuangbanna | Jinghong  | cp37  | 21.9138  | 101.0598  |
| China_yn37       |      | China            | Yunnan          | Xishuangbanna | Jinghong  | cp37  | 21.9128  | 101.0524  |
| Peng 22606-2     | HAST | China            | Sichuan         | Chengdu       | Wuhou     | cp38  | 30.6296  | 104.0717  |
| Peng 22934_2     | HAST | China            | Guangxi         | Chongzuo      | Longzhou  | cp39A | 22.4292  | 106.8603  |
| Peng 22951_1     | HAST | China            | Guangxi         | Chongzuo      | Longzhou  | cp39A | 22.4236  | 106.6433  |
| Peng 22951_2     | HAST | China            | Guangxi         | Chongzuo      | Longzhou  | cp39A | 22.4237  | 106.6433  |
| Peng 22951_3     | HAST | China            | Guangxi         | Chongzuo      | Longzhou  | cp39A | 22.4238  | 106.6433  |
| Peng 22951_4     | HAST | China            | Guangxi         | Chongzuo      | Longzhou  | cp39A | 22.4239  | 106.6433  |
| Chang_38         | MO   | China            | Beijing         |               |           | cp40  | 39.9959  | 116.3370  |
| China_BJ         |      | China            | Beijing         | Haidian       |           | cp40  | 39.9959  | 116.3370  |
| China_Xiangshan1 |      | China            | Beijing         | Haidian       |           | cp40  | 39.9893  | 116.2047  |
| China_Xiangshan2 |      | China            | Beijing         | Haidian       |           | cp40  | 39.9894  | 116.2047  |
| Liu 1321         | MO   | China            | Shanxi          |               |           | cp40  | 12.3059  | 109.1767  |
| Wang G382        | MO   | China            | Henan           | Shangcheng    |           | cp40  | 31.9617  | 115.4553  |
| Dorsett 7005     | US   | China            | Jilin           | Western Hills |           | cp44  | 44.3167  | 125.9631  |
| Chung_1726_1     | HAST | China            | Fujian          | Longyan       | Liancheng | cp45  | 25.4537  | 116.6705  |
| Kuo 03084        | MO   | China            | Shandong        |               |           | cp47  |          |           |
| BQUCH0114        |      | Fiji             | Viti Levu/      | Suva          |           | cp17A | -18.1418 | -178.4399 |
| Smith 1907       | NY   | Fiji             | Koro Island     |               |           | cp17A | -17.3032 | -179.4098 |
| Stokes 136       | US   | French Polynesia | Austral Islands | Rurutu        |           | cp17A | -18.6150 | -150.9851 |
| BQUCH0051        |      | French Polynesia | Marquesas       | Tahuata       |           | cp17B | -9.9514  | -139.0852 |
| CSC002           |      | Indonesia        | Sulawesi        | Tengah        | Pandere   | cp17D | 21.6340  | -158.0531 |
| CSC003           |      | Indonesia        | Sulawesi        | Tengah        | Pandere   | cp17D | 21.6339  | 119.9427  |
| CSC1             |      | Indonesia        | Sulawesi        | Tengah        | Pandere   | cp17D | -1.2017  | 119.9427  |
| CSC37            |      | Indonesia        | Sulawesi        | Tengah        | Bewa      | cp17D | -1.2017  | 119.9427  |
| CSC38            |      | Indonesia        | Sulawesi        | Tengah        | Bewa      | cp17D | -1.8706  | 120.2643  |
| CSC43            |      | Indonesia        | Sulawesi        | Tengah        | Gintu     | cp17D | -1.8695  | 120.2646  |
| CSC44            |      | Indonesia        | Sulawesi        | Tengah        | Gintu     | cp17D | -1.8872  | 120.2396  |



|                |      |           |          |               |                  |       |         |          |
|----------------|------|-----------|----------|---------------|------------------|-------|---------|----------|
| CSC55-1        |      | Indonesia | Sulawesi | Tengah        | Lengkeka         | cp17D | -1.8871 | 120.2396 |
| CSC55-2        |      | Indonesia | Sulawesi | Tengah        | Lengkeka         | cp17D | -1.8715 | 120.2105 |
| CSC55-3        |      | Indonesia | Sulawesi | Tengah        | Lengkeka         | cp17D | -1.8714 | 120.2105 |
| CSC56          |      | Indonesia | Sulawesi | Tengah        | Lengkeka         | cp17D | -1.8713 | 120.2105 |
| CSC59-1        |      | Indonesia | Sulawesi | Tengah        | Gintu            | cp17D | -1.8712 | 120.2105 |
| CSC59-2        |      | Indonesia | Sulawesi | Tengah        | Gintu            | cp17D | -1.8783 | 120.2447 |
| CSC59-3        |      | Indonesia | Sulawesi | Tengah        | Gintu            | cp17D | -1.8784 | 120.2447 |
| CSC59-4        |      | Indonesia | Sulawesi | Tengah        | Gintu            | cp17D | -1.8785 | 120.2447 |
| CSC59-5        |      | Indonesia | Sulawesi | Tengah        | Gintu            | cp17D | -1.8786 | 120.2447 |
| Chung 2367     | HAST | Japan     | Yaeyama  | Ishigaki      |                  | cp05B | 24.5808 | 124.3069 |
| Chung 2368     | HAST | Japan     | Yaeyama  | Ishigaki      |                  | cp05B | 24.5859 | 124.3166 |
| Chung 2369     | HAST | Japan     | Yaeyama  | Ishigaki      |                  | cp05B | 24.5210 | 124.2829 |
| Chung 2369     | HAST | Japan     | Yaeyama  | Ishigaki      |                  | cp05B | 24.5210 | 124.2829 |
| Chung 2369     | HAST | Japan     | Yaeyama  | Ishigaki      |                  | cp05B | 24.5210 | 124.2829 |
| Chung 2370     | HAST | Japan     | Yaeyama  | Ishigaki      |                  | cp05B | 24.4354 | 124.2489 |
| Chung 2371     | HAST | Japan     | Yaeyama  | Ishigaki      |                  | cp05B | 24.3657 | 124.1112 |
| Chung 2371     | HAST | Japan     | Yaeyama  | Ishigaki      |                  | cp05B | 24.3657 | 124.1112 |
| Chung 2371     | HAST | Japan     | Yaeyama  | Ishigaki      |                  | cp05B | 24.3657 | 124.1112 |
| Chung 2371     | HAST | Japan     | Yaeyama  | Ishigaki      |                  | cp05B | 24.3657 | 124.1112 |
| Chung 2377     | HAST | Japan     | Yaeyama  | Taketomi      |                  | cp05B | 24.3335 | 124.0909 |
| Chung 2377     | HAST | Japan     | Yaeyama  | Taketomi      |                  | cp05B | 24.3335 | 124.0909 |
| Chung 2377     | HAST | Japan     | Yaeyama  | Taketomi      |                  | cp05B | 24.3335 | 124.0909 |
| Chung 2377     | HAST | Japan     | Yaeyama  | Taketomi      |                  | cp05B | 24.3335 | 124.0909 |
| Chung 2383     | HAST | Japan     | Yaeyama  | Iriomote      |                  | cp05B | 24.3874 | 123.7476 |
| Chung 2383     | HAST | Japan     | Yaeyama  | Iriomote      |                  | cp05B | 24.3874 | 123.7476 |
| Chung 2383     | HAST | Japan     | Yaeyama  | Iriomote      |                  | cp05B | 24.3874 | 123.7476 |
| Nakamura 12910 | HAST | Japan     | Okinawa  | Kurima Island |                  | cp05B | 24.7214 | 125.2566 |
| Nakamura 12911 | HAST | Japan     | Okinawa  | Kurima Island |                  | cp05B | 24.7214 | 125.2566 |
| Nakamura 12912 | HAST | Japan     | Okinawa  | Kurima Island |                  | cp05B | 24.7214 | 125.2566 |
| liu 30-2       |      | Japan     | Tokyo    | Bunkyo        | Tokyo University | cp28  | 35.7218 | 139.7620 |
| liu 30-3       |      | Japan     | Tokyo    | Bunkyo        | Tokyo University | cp28  | 35.7218 | 139.7620 |

|              |      |                  |                  |                   |                   |       |          |           |
|--------------|------|------------------|------------------|-------------------|-------------------|-------|----------|-----------|
| liu 30       |      | Japan            | Tokyo            | Bunkyo            | Tokyo University  | cp42  | 35.7218  | 139.7620  |
| Moore 406    | US   | Niue             |                  |                   |                   | cp17A | -19.0897 | -169.8173 |
| Brass 30768  | US   | Papua New Guinea | Eastern highland |                   |                   | cp17C | -5.7686  | 145.0333  |
| Jermy 4345   | BM   | Papua New Guinea | Finisterre Range | upper Naho Valley | near Moro Village | cp34C | -6.0694  | 146.2864  |
| Pullen 6192  | BM   | Papua New Guinea | Finisterre Range | upper Naho Valley | near Moro Village | cp34C | -6.0694  | 146.2864  |
| Chung 2018_2 | HAST | Philippines      | Luzon/Laguna     | Los Baños         |                   | cp20A | 14.1677  | 121.2428  |
| Chung 2019_8 | HAST | Philippines      | Luzon/Laguna     | Calamba           |                   | cp20A | 14.1738  | 121.1914  |
| Chung 2018_1 | HAST | Philippines      | Luzon            | Laguna            | Los Baños         | cp21A | 14.1667  | 121.2428  |
| Chung 2018_3 | HAST | Philippines      | Luzon/Laguna     | Los Baños         |                   | cp43  | 14.1687  | 121.2428  |
| Chung 2019_2 | HAST | Philippines      | Luzon/Laguna     | Calamba           |                   | cp43  | 14.1736  | 121.1914  |
| Chung 2019_4 | HAST | Philippines      | Luzon/Laguna     | Calamba           |                   | cp43  | 14.1735  | 121.1914  |
| Chung 2019_6 | HAST | Philippines      | Luzon/Laguna     | Calamba           |                   | cp43  | 14.1734  | 121.1914  |
| Chung 2019_7 | HAST | Philippines      | Luzon/Laguna     | Calamba           |                   | cp43  | 14.1737  | 121.1914  |
| Pc_136       |      | Pitcairn         |                  |                   |                   | cp17A | -25.0654 | -130.0993 |
| BQUCH0068    |      | Samoa            | Upolu            |                   |                   | cp17A | -13.9134 | -171.7349 |
| Yang 23448   | TNM  | Solomon Islands  | Guadalcanal      | Honiara           | Kukum Hwy         | cp21A | -9.4300  | 159.9478  |
| Yang 23449   | TNM  | Solomon Islands  | Guadalcanal      | Honiara           | Kukum Hwy         | cp21A | -9.4300  | 159.9478  |
| 42_Hsinwu    | HAST | Taiwan           | Taoyuan          | Hsinwu            |                   | cp01A | 24.9486  | 121.0747  |
| A15-1        | HAST | Taiwan           | Taipei           | Tamsui            |                   | cp01A | 25.1410  | 121.4615  |
| A17-2        | HAST | Taiwan           | Taipei           | Jinshan           |                   | cp01A | 25.1704  | 121.5384  |
| A2-1         | HAST | Taiwan           | Taipei           | Pinglin           |                   | cp01A | 24.8867  | 121.6666  |
| A23-1        | HAST | Taiwan           | Taipei           | Gongliao          |                   | cp01A | 25.0174  | 121.9446  |
| A23-2        | HAST | Taiwan           | Taipei           | Gongliao          |                   | cp01A | 25.0174  | 121.9446  |
| A23-3        | HAST | Taiwan           | Taipei           | Gongliao          |                   | cp01A | 25.0174  | 121.9446  |
| A3-1♀        | HAST | Taiwan           | Taipei           | Shiding           |                   | cp01A | 24.9595  | 121.6133  |
| A34-2        | HAST | Taiwan           | Taipei           | Sanxia            |                   | cp01A | 24.8304  | 121.4447  |
| A5           | HAST | Taiwan           | Taipei           | Xindian           |                   | cp01A | 24.9532  | 121.5923  |
| A6-1♀        | HAST | Taiwan           | Taipei           | Xindian           |                   | cp01A | 24.8902  | 121.5513  |
| A7-1♀        | HAST | Taiwan           | Taipei           | Wulai             |                   | cp01A | 24.8507  | 121.5698  |
| A8-1         | HAST | Taiwan           | Taipei           | Wulai             |                   | cp01A | 24.8533  | 121.5489  |
| Chung 2665_1 | HAST | Taiwan           | Yilan            |                   |                   | cp01A | 24.6152  | 121.4840  |
| Chung 2665_2 | HAST | Taiwan           | Yilan            |                   |                   | cp01A | 24.6152  | 121.4840  |

|              |      |        |          |              |  |       |         |          |
|--------------|------|--------|----------|--------------|--|-------|---------|----------|
| Chung 2665_3 | HAST | Taiwan | Yilan    |              |  | cp01A | 24.6152 | 121.4840 |
| Chung 2666_1 | HAST | Taiwan | Yilan    |              |  | cp01A | 24.6860 | 121.7130 |
| Chung 2666_2 | HAST | Taiwan | Yilan    |              |  | cp01A | 24.6860 | 121.7130 |
| Chung 2667_1 | HAST | Taiwan | Yilan    |              |  | cp01A | 24.6860 | 121.7127 |
| Chung 2667_2 | HAST | Taiwan | Yilan    |              |  | cp01A | 24.6860 | 121.7127 |
| Chung 2668_1 | HAST | Taiwan | Yilan    |              |  | cp01A | 24.6859 | 121.7514 |
| Chung 2668_2 | HAST | Taiwan | Yilan    |              |  | cp01A | 24.6859 | 121.7514 |
| Chung 2668_3 | HAST | Taiwan | Yilan    |              |  | cp01A | 24.6859 | 121.7514 |
| Chung 2669_1 | HAST | Taiwan | Yilan    |              |  | cp01A | 24.7414 | 121.7719 |
| Chung 2669_2 | HAST | Taiwan | Yilan    |              |  | cp01A | 24.7414 | 121.7719 |
| Chung 2669_3 | HAST | Taiwan | Yilan    |              |  | cp01A | 24.7414 | 121.7719 |
| D115-2       | HAST | Taiwan | Taoyuan  | Fuxing       |  | cp01A | 24.7821 | 121.3583 |
| D115-3       | HAST | Taiwan | Taoyuan  | Fuxing       |  | cp01A | 24.7822 | 121.3583 |
| E90-4        | HAST | Taiwan | Hsinchu  | Paoshan      |  | cp01A | 24.7552 | 121.0070 |
| E91-2        | HAST | Taiwan | Hsinchu  | Qionglin     |  | cp01A | 24.7669 | 121.0806 |
| E92-1        | HAST | Taiwan | Hsinchu  | Guanxi       |  | cp01A | 24.7682 | 121.2168 |
| F57-1        | HAST | Taiwan | Miaoli   | Tongxiao     |  | cp01A | 24.4797 | 120.6785 |
| F59-2_a      | HAST | Taiwan | Miaoli   | Toufen       |  | cp01A | 24.6772 | 120.8969 |
| F60-2        | HAST | Taiwan | Miaoli   | Sanwan       |  | cp01A | 24.6028 | 120.9585 |
| F61-2        | HAST | Taiwan | Miaoli   | Sanwan       |  | cp01A | 24.4639 | 120.8854 |
| G19-1        | HAST | Taiwan | Yilan    | Datong       |  | cp01A | 24.6627 | 121.5896 |
| G24-1        | HAST | Taiwan | Taichung | Heping       |  | cp01A | 24.2169 | 120.8894 |
| G56-2        | HAST | Taiwan | Taichung | Dajia        |  | cp01A | 24.3451 | 120.6245 |
| H33          | HAST | Taiwan | Hualien  | Xincheng     |  | cp01A | 24.2394 | 121.7158 |
| N27          | HAST | Taiwan | Hualien  | Zhuoxi       |  | cp01A | 23.3185 | 121.2191 |
| N69-1        | HAST | Taiwan | Hualien  | Fengbin      |  | cp01A | 23.5652 | 121.5174 |
| N69-2        | HAST | Taiwan | Hualien  | Fengbin      |  | cp01A | 23.5650 | 121.5174 |
| Q100_1       | HAST | Taiwan | Yilan    | Datong       |  | cp01A | 24.5350 | 121.5073 |
| A4-1♀        | HAST | Taiwan | Taipei   | Xindian      |  | cp02  | 24.9554 | 121.5029 |
| F62-2        | HAST | Taiwan | Miaoli   | Zhuolan      |  | cp03  | 24.3332 | 120.8081 |
| G11-3        | HAST | Taiwan | Taichung | Xinshe       |  | cp03  | 24.1550 | 120.8928 |
| E89-1_a      | HAST | Taiwan | Hsinchu  | Hsinchu City |  | cp04  | 24.7349 | 120.9135 |

|         |      |        |           |              |  |       |         |          |
|---------|------|--------|-----------|--------------|--|-------|---------|----------|
| D28     | HAST | Taiwan | Taoyuan   | Fuxing       |  | cp05A | 24.8305 | 121.3491 |
| H66-2   | HAST | Taiwan | Hualien   | Hualien City |  | cp05A | 23.9808 | 121.6159 |
| H66-3   | HAST | Taiwan | Hualien   | Hualien City |  | cp05A | 23.9808 | 121.6159 |
| H66-5_a | HAST | Taiwan | Hualien   | Hualien City |  | cp05A | 23.9808 | 121.6159 |
| H93     | HAST | Taiwan | Hualien   | Zhuoxi       |  | cp05A | 23.3184 | 121.2189 |
| N72-2   | HAST | Taiwan | Hualien   | Yuli         |  | cp05A | 23.2828 | 121.3243 |
| N72-3   | HAST | Taiwan | Hualien   | Yuli         |  | cp05A | 23.2828 | 121.3243 |
| N72-4   | HAST | Taiwan | Hualien   | Yuli         |  | cp05A | 23.2828 | 121.3243 |
| N72-5   | HAST | Taiwan | Hualien   | Yuli         |  | cp05A | 23.2828 | 121.3243 |
| N75-2   | HAST | Taiwan | Taitung   | Luye         |  | cp05A | 22.8959 | 121.1235 |
| N75-3   | HAST | Taiwan | Taitung   | Luye         |  | cp05A | 22.8959 | 121.1235 |
| N95_a   | HAST | Taiwan | Taitung   | Changbin     |  | cp05A | 23.2853 | 121.4187 |
| H36-1   | HAST | Taiwan | Hualien   | Xincheng     |  | cp06  | 24.1560 | 121.6177 |
| H36-2_a | HAST | Taiwan | Hualien   | Xincheng     |  | cp06  | 24.1561 | 121.6177 |
| H36-3   | HAST | Taiwan | Hualien   | Xincheng     |  | cp06  | 24.1563 | 121.6177 |
| H36-4   | HAST | Taiwan | Hualien   | Xincheng     |  | cp06  | 24.1564 | 121.6177 |
| H37-2   | HAST | Taiwan | Hualien   | Xincheng     |  | cp06  | 24.0461 | 121.6175 |
| H66-1   | HAST | Taiwan | Hualien   | Hualien City |  | cp06  | 23.9808 | 121.6159 |
| H66-4   | HAST | Taiwan | Hualien   | Hualien City |  | cp06  | 23.9808 | 121.6159 |
| H36-5   | HAST | Taiwan | Hualien   | Xincheng     |  | cp07  | 24.1562 | 121.6177 |
| N97     | HAST | Taiwan | Taitung   | Guanshan     |  | cp08  | 23.1356 | 121.0522 |
| G11-4♀  | HAST | Taiwan | Taichung  | Xinshe       |  | cp09A | 24.1555 | 120.8928 |
| G11-5   | HAST | Taiwan | Taichung  | Xinshe       |  | cp09A | 24.1555 | 120.8928 |
| G55-2   | HAST | Taiwan | Taichung  | Wuqi         |  | cp09A | 24.2552 | 120.5255 |
| K107-2  | HAST | Taiwan | Tainan    | Nanhua       |  | cp09A | 23.0769 | 120.4950 |
| K107-3  | HAST | Taiwan | Tainan    | Nanhua       |  | cp09A | 23.0779 | 120.4950 |
| K113-1♀ | HAST | Taiwan | Tainan    | Qigu         |  | cp09A | 23.1598 | 120.1347 |
| K113-2  | HAST | Taiwan | Tainan    | Qigu         |  | cp09A | 23.1608 | 120.1347 |
| K113-3♀ | HAST | Taiwan | Tainan    | Qigu         |  | cp09A | 23.1618 | 120.1347 |
| K113-4  | HAST | Taiwan | Tainan    | Qigu         |  | cp09A | 23.1628 | 120.1347 |
| K114-3  | HAST | Taiwan | Tainan    | Qigu         |  | cp09A | 23.1836 | 120.3126 |
| L110-1  | HAST | Taiwan | Kaohsiung | Meinong      |  | cp09A | 22.8582 | 120.5656 |

|         |      |        |           |          |  |       |         |          |
|---------|------|--------|-----------|----------|--|-------|---------|----------|
| L110-2  | HAST | Taiwan | Kaohsiung | Meinong  |  | cp09A | 22.8592 | 120.5656 |
| L110-3  | HAST | Taiwan | Kaohsiung | Meinong  |  | cp09A | 22.8602 | 120.5656 |
| L110-4  | HAST | Taiwan | Kaohsiung | Meinong  |  | cp09A | 22.8612 | 120.5656 |
| L110-5  | HAST | Taiwan | Kaohsiung | Meinong  |  | cp09A | 22.8622 | 120.5656 |
| M111-2  | HAST | Taiwan | Pingtung  | Yanpu    |  | cp09A | 22.7455 | 120.5612 |
| M112-1♀ | HAST | Taiwan | Kaohsiung | Daliao   |  | cp09A | 22.5954 | 120.4195 |
| M112-2♀ | HAST | Taiwan | Kaohsiung | Daliao   |  | cp09A | 22.5953 | 120.4195 |
| M112-3♀ | HAST | Taiwan | Kaohsiung | Daliao   |  | cp09A | 22.5952 | 120.4195 |
| K102-1♂ | HAST | Taiwan | Tainan    | Rende    |  | cp09B | 22.9503 | 120.2189 |
| K102-3  | HAST | Taiwan | Tainan    | Rende    |  | cp09B | 22.9504 | 120.2189 |
| K102-4♂ | HAST | Taiwan | Tainan    | Rende    |  | cp09B | 22.9504 | 120.2189 |
| K102-5♂ | HAST | Taiwan | Tainan    | Rende    |  | cp09B | 22.9504 | 120.2189 |
| K103-2♀ | HAST | Taiwan | Kaohsiung | Ciaotou  |  | cp09B | 22.7446 | 120.3165 |
| K103-5♀ | HAST | Taiwan | Kaohsiung | Ciaotou  |  | cp09B | 22.7448 | 120.3165 |
| K107-1  | HAST | Taiwan | Tainan    | Nanhua   |  | cp09B | 23.0759 | 120.4950 |
| L104-2♀ | HAST | Taiwan | Kaohsiung | Sanmin   |  | cp09B | 22.6536 | 120.3133 |
| L104-3  | HAST | Taiwan | Kaohsiung | Sanmin   |  | cp09B | 22.6535 | 120.3133 |
| L104-5♀ | HAST | Taiwan | Kaohsiung | Sanmin   |  | cp09B | 22.6533 | 120.3133 |
| LD_1    | HAST | Taiwan | Taitung   | Ludao    |  | cp09B | 22.6585 | 121.4850 |
| MF3_a   | HAST | Taiwan | Pingtung  | Fangshan |  | cp09B | 22.4040 | 120.6931 |
| MH01_a  | HAST | Taiwan | Pingtung  | Hengchun |  | cp09B | 21.9587 | 120.7373 |
| MH02    | HAST | Taiwan | Pingtung  | Hengchun |  | cp09B | 21.9586 | 120.7373 |
| MS1     | HAST | Taiwan | Pingtung  | Fangliao |  | cp09B | 22.4010 | 120.5899 |
| N79-1_a | HAST | Taiwan | Taitung   | Taimali  |  | cp09B | 22.6225 | 121.0110 |
| K108-2  | HAST | Taiwan | Kaohsiung | Jiasian  |  | cp09C | 23.0807 | 120.5949 |
| K108-3  | HAST | Taiwan | Kaohsiung | Jiasian  |  | cp09C | 23.0817 | 120.5949 |
| K108-5  | HAST | Taiwan | Kaohsiung | Jiasian  |  | cp09C | 23.0800 | 120.5949 |
| L109-2♀ | HAST | Taiwan | Kaohsiung | Cishan   |  | cp09C | 22.9542 | 120.5133 |
| L109-4♀ | HAST | Taiwan | Kaohsiung | Cishan   |  | cp09C | 22.9552 | 120.5133 |
| L109-5♀ | HAST | Taiwan | Kaohsiung | Cishan   |  | cp09C | 22.9562 | 120.5133 |
| M31-1   | HAST | Taiwan | Pingtung  | Sandimen |  | cp09C | 22.7094 | 120.6742 |
| P25-1   | HAST | Taiwan | Nantou    | Ren'ai   |  | cp09C | 24.0378 | 121.1451 |

|            |      |        |          |              |  |       |         |          |
|------------|------|--------|----------|--------------|--|-------|---------|----------|
| K113-5     | HAST | Taiwan | Tainan   | Qigu         |  | cp09D | 23.1638 | 120.1347 |
| I45-2      | HAST | Taiwan | Yunlin   | Lunbei       |  | cp10  | 23.7570 | 120.3638 |
| J51-1      | HAST | Taiwan | Chiayi   | Jhongpu      |  | cp11  | 23.4420 | 120.5179 |
| H41-1      | HAST | Taiwan | Changhua | Dacheng      |  | cp12  | 23.8615 | 120.2954 |
| H41-2      | HAST | Taiwan | Changhua | Dacheng      |  | cp12  | 23.8614 | 120.2954 |
| H41-3_a    | HAST | Taiwan | Changhua | Dacheng      |  | cp12  | 23.8613 | 120.2954 |
| I49-2      | HAST | Taiwan | Yunlin   | Dounan       |  | cp12  | 23.6753 | 120.4761 |
| I53-3      | HAST | Taiwan | Yunlin   | Douliou      |  | cp12  | 23.7189 | 120.5743 |
| I53-4      | HAST | Taiwan | Yunlin   | Douliou      |  | cp12  | 23.7190 | 120.5743 |
| NCJH24     | HAST | Taiwan | Taitung  | Taitung City |  | cp12  | 22.7600 | 121.1630 |
| P54-2_a    | HAST | Taiwan | Nantou   | Jhushan      |  | cp12  | 23.7776 | 120.7125 |
| Chung 1931 | HAST | Taiwan | Penghu   | Penghu       |  | cp13  | 23.5637 | 119.6435 |
| H39-2      | HAST | Taiwan | Changhua | Fusing       |  | cp13  | 24.0468 | 120.4503 |
| I43-2      | HAST | Taiwan | Yunlin   | Dongshih     |  | cp13  | 23.6575 | 120.2715 |
| J51-3_a    | HAST | Taiwan | Chiayi   | Jhongpu      |  | cp13  | 23.4421 | 120.5179 |
| J52-2      | HAST | Taiwan | Chiayi   | Meishan      |  | cp13  | 23.5901 | 120.5424 |
| K105-1     | HAST | Taiwan | Tainan   | Yongkang     |  | cp14A | 23.0008 | 120.2352 |
| K105-2     | HAST | Taiwan | Tainan   | Yongkang     |  | cp14B | 23.0009 | 120.2352 |
| K105-3     | HAST | Taiwan | Tainan   | Yongkang     |  | cp14C | 23.0010 | 120.2352 |
| K105-4♂    | HAST | Taiwan | Tainan   | Yongkang     |  | cp14C | 23.0015 | 120.2352 |
| NL01       | HAST | Taiwan | Taitung  | Lanyu        |  | cp15  | 22.0280 | 121.5522 |
| K106-1     | HAST | Taiwan | Tainan   | Zuozhen      |  | cp16A | 23.0663 | 120.3809 |
| K106-2     | HAST | Taiwan | Tainan   | Zuozhen      |  | cp16A | 23.0662 | 120.3809 |
| K106-3     | HAST | Taiwan | Tainan   | Zuozhen      |  | cp16A | 23.0662 | 120.3809 |
| K106-4_a   | HAST | Taiwan | Tainan   | Zuozhen      |  | cp16A | 23.0662 | 120.3809 |
| K106-5     | HAST | Taiwan | Tainan   | Zuozhen      |  | cp16A | 23.0663 | 120.3809 |
| K114-2     | HAST | Taiwan | Tainan   | Qigu         |  | cp16A | 23.1837 | 120.3128 |
| K114-4     | HAST | Taiwan | Tainan   | Qigu         |  | cp16A | 23.1838 | 120.3135 |
| M111-1♂    | HAST | Taiwan | Pingtung | Yanpu        |  | cp16A | 22.7445 | 120.5612 |
| M111-3_a♀  | HAST | Taiwan | Pingtung | Yanpu        |  | cp16A | 22.7465 | 120.5612 |
| M111-4_a♀  | HAST | Taiwan | Pingtung | Yanpu        |  | cp16A | 22.7475 | 120.5612 |
| M111-5     | HAST | Taiwan | Pingtung | Yanpu        |  | cp16A | 22.7485 | 120.5612 |

|          |      |        |           |              |  |       |         |          |
|----------|------|--------|-----------|--------------|--|-------|---------|----------|
| M93-1    | HAST | Taiwan | Pingtung  | Laiyi        |  | cp16A | 22.5268 | 120.6390 |
| N29      | HAST | Taiwan | Taitung   | Beinan       |  | cp16A | 22.7549 | 121.0564 |
| N75-1    | HAST | Taiwan | Taitung   | Luye         |  | cp16A | 22.8959 | 121.1235 |
| N75-4    | HAST | Taiwan | Taitung   | Luye         |  | cp16A | 22.8960 | 121.1235 |
| N77-1    | HAST | Taiwan | Taitung   | Taitung City |  | cp16A | 22.7849 | 121.1291 |
| N77-4    | HAST | Taiwan | Taitung   | Taitung City |  | cp16A | 22.7848 | 121.1291 |
| N80-1    | HAST | Taiwan | Taitung   | Dawu         |  | cp16A | 22.4554 | 120.9430 |
| N94      | HAST | Taiwan | Taitung   | Yanping      |  | cp16A | 22.9140 | 121.0412 |
| N96      | HAST | Taiwan | Taitung   | Guanshan     |  | cp16A | 23.1190 | 121.1181 |
| NCJH10   | HAST | Taiwan | Taitung   | Taitung City |  | cp16A | 22.7543 | 121.1464 |
| NCJH11   | HAST | Taiwan | Taitung   | Taitung City |  | cp16A | 22.7553 | 121.1464 |
| NCJH12   | HAST | Taiwan | Taitung   | Taitung City |  | cp16A | 22.7563 | 121.1464 |
| NCJH13   | HAST | Taiwan | Taitung   | Taitung City |  | cp16A | 22.7573 | 121.1464 |
| NCJH14   | HAST | Taiwan | Taitung   | Taitung City |  | cp16A | 22.7583 | 121.1464 |
| NCJH15   | HAST | Taiwan | Taitung   | Taitung City |  | cp16A | 22.7593 | 121.1464 |
| NCJH16_a | HAST | Taiwan | Taitung   | Taitung City |  | cp16A | 22.7520 | 121.1437 |
| NCJH17   | HAST | Taiwan | Taitung   | Taitung City |  | cp16A | 22.7530 | 121.1437 |
| NCJH18   | HAST | Taiwan | Taitung   | Taitung City |  | cp16A | 22.7540 | 121.1437 |
| NCJH19   | HAST | Taiwan | Taitung   | Taitung City |  | cp16A | 22.7550 | 121.1437 |
| NCJH20_a | HAST | Taiwan | Taitung   | Taitung City |  | cp16A | 22.7560 | 121.1437 |
| NCJH21   | HAST | Taiwan | Taitung   | Taitung City |  | cp16A | 22.7570 | 121.1630 |
| NCJH22   | HAST | Taiwan | Taitung   | Taitung City |  | cp16A | 22.7580 | 121.1630 |
| NCJH23   | HAST | Taiwan | Taitung   | Taitung City |  | cp16A | 22.7590 | 121.1630 |
| NCJH9    | HAST | Taiwan | Taitung   | Taitung City |  | cp16A | 22.7533 | 121.1464 |
| NL02     | HAST | Taiwan | Taitung   | Lanyu        |  | cp16A | 22.0281 | 121.5522 |
| K103-1   | HAST | Taiwan | Kaohsiung | Ciaotou      |  | cp16B | 22.7447 | 120.3165 |
| K103-3   | HAST | Taiwan | Kaohsiung | Ciaotou      |  | cp16B | 22.7448 | 120.3165 |
| K103-4   | HAST | Taiwan | Kaohsiung | Ciaotou      |  | cp16B | 22.7448 | 120.3165 |
| K107-4   | HAST | Taiwan | Tainan    | Nanhua       |  | cp17A | 23.0789 | 120.4950 |
| K107-5_a | HAST | Taiwan | Tainan    | Nanhua       |  | cp17A | 23.0799 | 120.4950 |
| M81-1    | HAST | Taiwan | Pingtung  | Fangshan     |  | cp17A | 22.2427 | 120.6652 |
| M81-4    | HAST | Taiwan | Pingtung  | Fangshan     |  | cp17A | 22.2426 | 120.6652 |

|               |      |                 |            |                  |                        |       |          |           |
|---------------|------|-----------------|------------|------------------|------------------------|-------|----------|-----------|
| M83-1_a♂      | HAST | Taiwan          | Pingtung   | Pingtung City    |                        | cp17A | 22.6945  | 120.4924  |
| MF1           | HAST | Taiwan          | Pingtung   | Fangshan         |                        | cp17A | 22.4030  | 120.6931  |
| MS3           | HAST | Taiwan          | Pingtung   | Fangliao         |                        | cp17A | 22.4020  | 120.5899  |
| N74-1         | HAST | Taiwan          | Taitung    | Guanshan         |                        | cp17A | 23.0196  | 121.1533  |
| L104-4        | HAST | Taiwan          | Kaohsiung  | Sanmin           |                        | cp18  | 22.6534  | 120.3133  |
| MW02          | HAST | Taiwan          | Pingtung   | Wandan           |                        | cp19  | 22.5631  | 120.4979  |
| Chung_2418    | HAST | Taiwan (R.O.C.) | Fujian     | Lianjiang        | Machu                  | cp46  | 26.2291  | 119.9966  |
| Chung_2419    | HAST | Taiwan (R.O.C.) | Fujian     | Lianjiang        | Machu                  | cp46  | 26.2291  | 119.9966  |
| Chung_2420    | HAST | Taiwan (R.O.C.) | Fujian     | Lianjiang        | Machu                  | cp46  | 26.2291  | 119.9966  |
| Chung_2421    | HAST | Taiwan (R.O.C.) | Fujian     | Lianjiang        | Machu                  | cp46  | 26.2291  | 119.9966  |
| Chung_2422    | HAST | Taiwan (R.O.C.) | Fujian     | Lianjiang        | Machu                  | cp46  | 26.2291  | 119.9966  |
| Chung_2423    | HAST | Taiwan (R.O.C.) | Fujian     | Lianjiang        | Machu                  | cp46  | 26.2291  | 119.9966  |
| Chung_2424    | HAST | Taiwan (R.O.C.) | Fujian     | Lianjiang        | Machu                  | cp46  | 26.2291  | 119.9966  |
| Chung 2697    | HAST | Taiwan (R.O.C.) | Fujian     | Kinmen           | Kincheng               | cp48  | 24.4395  | 118.3176  |
| Chung 2698    | HAST | Taiwan (R.O.C.) | Fujian     | Kinmen           | Kinning                | cp48  | 24.4782  | 118.3134  |
| Chung 2699    | HAST | Taiwan (R.O.C.) | Fujian     | Kinmen           | Kinning                | cp48  | 24.4782  | 118.3134  |
| Chung 2700    | HAST | Taiwan (R.O.C.) | Fujian     | Kinmen           | Kinning                | cp48  | 24.4782  | 118.3134  |
| Phutthai 263  | PSU  | Thailand        | Bangkok    | Nakhon Pathom    |                        | cp20A | 13.9381  | 100.1060  |
| Phutthai 265  | PSU  | Thailand        | Bangkok    | Nakhon Pathom    |                        | cp20A | 13.9381  | 100.1060  |
| Soejarto_6059 | MO   | Thailand        | Saraburi   | Muaklek District |                        | cp20A | 14.0667  | 101.1667  |
| BQUCH0104     |      | Tonga           | Tongatapu  | Vaini            |                        | cp17A | -21.1936 | -175.1771 |
| BQUCH0110     |      | Tonga           | Tongatapu  | Pelehake         |                        | cp17A | -21.2170 | -175.1395 |
| BQUCH0363     |      | Tonga           | Eua        | lakufaaga        |                        | cp17A | -21.3957 | -174.9359 |
| Yuncker 15471 | US   | Tonga           | Eua Island |                  |                        | cp17A | -21.3927 | -174.9195 |
| Yuncker 15177 | NY   | Tonga           | Tongatapu  |                  |                        | cp17A | -21.1302 | -175.2523 |
| BQUCH0059     |      | USA             | Hawaii     | Hawaii           | Kealakekua             | cp17A | 19.5270  | -155.9134 |
| Brown 1274    | NY   | USA             | Hawaii     | Oahu             | Napooqoo               | cp17A | 21.3751  | -157.9096 |
| csa-bm-059    | TNM  | USA             | Hawaii     | Oahu             | Bishop Museum          | cp17A | 21.3332  | -157.8885 |
| csa-bm-060    | TNM  | USA             | Hawaii     | Oahu             | Bishop Museum          | cp17A | 21.3333  | -157.8885 |
| csa-dt-093    | TNM  | USA             | Hawaii     | Oahu             |                        | cp17A | 21.4371  | -157.9935 |
| csa-dt-094    | TNM  | USA             | Hawaii     | Oahu             |                        | cp17A | 21.4372  | -157.9935 |
| csa-gw-077    | TNM  | USA             | Hawaii     | Hawaii           | Amy B. H. Greenwell BG | cp17A | 19.9872  | -155.9138 |



|                     |        |     |                |            |                                       |       |          |           |
|---------------------|--------|-----|----------------|------------|---------------------------------------|-------|----------|-----------|
| csa-gw-078          | TNM    | USA | Hawaii         | Hawaii     | Amy B. H. Greenwell BG                | cp17A | 19.9873  | -155.9138 |
| csa-gw-079          | TNM    | USA | Hawaii         | Hawaii     | Amy B. H. Greenwell BG                | cp17A | 19.9874  | -155.9138 |
| csa-gw-080          | TNM    | USA | Hawaii         | Hawaii     | Amy B. H. Greenwell BG                | cp17A | 19.9875  | -155.9138 |
| csa-gw-081          | TNM    | USA | Hawaii         | Hawaii     | Amy B. H. Greenwell BG                | cp17A | 19.9876  | -155.9138 |
| csa-gw-082          | TNM    | USA | Hawaii         | Hawaii     | Amy B. H. Greenwell BG                | cp17A | 19.9877  | -155.9138 |
| csa-gw-083          | TNM    | USA | Hawaii         | Hawaii     | Amy B. H. Greenwell BG                | cp17A | 19.9878  | -155.9138 |
| csa-gw-084          | TNM    | USA | Hawaii         | Hawaii     | Amy B. H. Greenwell BG                | cp17A | 19.9879  | -155.9138 |
| csa-h-106           | TNM    | USA | Hawaii         | Oahu       | University of Hawaii                  | cp17A | 21.2975  | -157.8146 |
| csa-ki-100          | TNM    | USA | Hawaii         | Kauai      | NTBG National Headquarters            | cp17A | 21.9080  | -159.5121 |
| csa-lc-101          | TNM    | USA | Hawaii         | Oahu       | Pearl City, Leeward Community College | cp17A | 21.3917  | -157.9860 |
| csa-lc-103          | TNM    | USA | Hawaii         | Oahu       | Pearl City, Leeward Community College | cp17A | 21.3918  | -157.9860 |
| csa-lc-104          | TNM    | USA | Hawaii         | Oahu       | Pearl City, Leeward Community College | cp17A | 21.3919  | -157.9860 |
| csa-mk-088          | TNM    | USA | Hawaii         | Maui       | NTBG Kahanu Garden                    | cp17A | 20.6529  | -156.0573 |
| csa-mk-089          | TNM    | USA | Hawaii         | Maui       | NTBG Kahanu Garden                    | cp17A | 20.6530  | -156.0573 |
| csa-mk-090          | TNM    | USA | Hawaii         | Maui       | NTBG Kahanu Garden                    | cp17A | 20.6531  | -156.0573 |
| csa-mk-091          | TNM    | USA | Hawaii         | Maui       | NTBG Kahanu Garden                    | cp17A | 20.6532  | -156.0573 |
| csa-un-048          | TNM    | USA | Hawaii         | Oahu       | University of Hawaii                  | cp17A | 21.3015  | -157.8150 |
| csa-un-050          | TNM    | USA | Hawaii         | Oahu       | University of Hawaii                  | cp17A | 21.3014  | -157.8150 |
| csa-un-055          | TNM    | USA | Hawaii         | Oahu       | University of Hawaii                  | cp17A | 21.2955  | -157.8123 |
| Degener 8684        | US     | USA | Hawaii         | Oahu       |                                       | cp17A | 21.3751  | -157.9096 |
| Degener 8688        | NY, US | USA | Hawaii         | Molokai    |                                       | cp17A | 21.1299  | -157.0551 |
| Rankin s.n.         | NY     | USA | Hawaii         | Oahu       |                                       | cp17A | 21.3751  | -157.9096 |
| Rock 3662           | US     | USA | Hawaii         | Hawaii     | Puu Anahulu settlement                | cp17A | 19.7146  | -155.1018 |
| Yuncker 9204        | NY     | USA | American Samoa | Tau Island |                                       | cp17A | -14.2181 | -169.4240 |
| Degener 8683        | US     | USA | Hawaii         | Oahu       |                                       | cp17D | 21.4374  | -157.9935 |
| Brown 1273          | NY     | USA | Hawaii         | Oahu       | Napooqoo                              | cp17E | 21.4374  | -157.9935 |
| Christophersen 3719 | US     | USA | Hawaii         | Oahu       | Waianae Mts.                          | cp17E | 21.4374  | -157.9935 |
| csa-dt-096          | TNM    | USA | Hawaii         | Oahu       |                                       | cp17F | 21.4374  | -157.9935 |
| Degener 8687        | NY     | USA | Hawaii         | Moloka     |                                       | cp20A | 21.1088  | -157.0496 |
| csa-bm-061          | TNM    | USA | Hawaii         | Oahu       | Bishop Museum                         | cp41A | 21.3334  | -157.8885 |
| csa-bm-098          | TNM    | USA | Hawaii         | Oahu       | Bishop Museum                         | cp41B | 21.3332  | -157.8718 |

|            |      |         |           |            |                        |       |         |           |
|------------|------|---------|-----------|------------|------------------------|-------|---------|-----------|
| csa-dt-095 | TNM  | USA     | Hawaii    | Oahu       |                        | cp41B | 21.4373 | -157.9935 |
| csa-gw-073 | TNM  | USA     | Hawaii    | Hawaii     | Amy B. H. Greenwell BG | cp41B | 19.9869 | -155.9138 |
| csa-gw-074 | TNM  | USA     | Hawaii    | Hawaii     | Amy B. H. Greenwell BG | cp41B | 19.9870 | -155.9138 |
| csa-gw-076 | TNM  | USA     | Hawaii    | Hawaii     | Amy B. H. Greenwell BG | cp41B | 19.9871 | -155.9138 |
| csa-h-108  | TNM  | USA     | Hawaii    | Oahu       | Bishop Museum          | cp41B | 21.3333 | -157.8705 |
| csa-lu-062 | TNM  | USA     | Hawaii    | Oahu       | Lili'UOKALANI BG       | cp41B | 21.3185 | -157.8571 |
| csa-lu-063 | TNM  | USA     | Hawaii    | Oahu       | Lili'UOKALANI BG       | cp41B | 21.3185 | -157.8571 |
| csa-lu-064 | TNM  | USA     | Hawaii    | Oahu       | Lili'UOKALANI BG       | cp41B | 21.3184 | -157.8571 |
| csa-lu-065 | TNM  | USA     | Hawaii    | Oahu       | Lili'UOKALANI BG       | cp41B | 21.3186 | -157.8571 |
| csa-lu-066 | TNM  | USA     | Hawaii    | Oahu       | Lili'UOKALANI BG       | cp41B | 21.3186 | -157.8571 |
| csa-un-054 | TNM  | USA     | Hawaii    | Oahu       | University of Hawaii   | cp41B | 21.2954 | -157.8123 |
| csa-un-056 | TNM  | USA     | Hawaii    | Oahu       | University of Hawaii   | cp41B | 21.2956 | -157.8123 |
| csa-wv-067 | TNM  | USA     | Hawaii    | Oahu       | Waimea Valley          | cp41B | 21.2957 | -157.8123 |
| csa-wv-068 | TNM  | USA     | Hawaii    | Oahu       | Waimea Valley          | cp41B | 21.6335 | -158.0531 |
| csa-wv-069 | TNM  | USA     | Hawaii    | Oahu       | Waimea Valley          | cp41B | 21.6336 | -158.0531 |
| csa-wv-070 | TNM  | USA     | Hawaii    | Oahu       | Waimea Valley          | cp41B | 21.6337 | -158.0531 |
| csa-wv-071 | TNM  | USA     | Hawaii    | Oahu       | Waimea Valley          | cp41B | 21.6338 | -158.0531 |
| csa-wv-072 | TNM  | USA     | Hawaii    | Oahu       | Waimea Valley          | cp41B | 21.6339 | -158.0531 |
| csa-dt-097 | TNM  | USA     | Hawaii    | Oahu       |                        | cp41C | 21.4375 | -157.9935 |
| Liu 119_1  | HAST | Vietnam | Ninh Binh | Hoa Lu     |                        | cp20A | 21.0246 | 105.8591  |
| Liu 126_1  | HAST | Vietnam | Khánh Hòa | Nha Trang  |                        | cp20A | 17.6620 | 106.5114  |
| Liu 126_2  | HAST | Vietnam | Khánh Hòa | Nha Trang  |                        | cp20A | 12.1128 | 109.1261  |
| Liu 126_3  | HAST | Vietnam | Khánh Hòa | Nha Trang  |                        | cp20A | 12.1128 | 109.1261  |
| Liu 127    | HAST | Vietnam | Khánh Hòa | Cam Lâm    |                        | cp20A | 12.1128 | 109.1261  |
| Liu 128_2  | HAST | Vietnam | Khánh Hòa | Diên Khánh |                        | cp20A | 12.2052 | 109.0724  |
| Liu 129    | HAST | Vietnam | Khánh Hòa | Nha Trang  |                        | cp20A | 12.2052 | 109.0724  |
| Liu 131_2  | HAST | Vietnam | Khánh Hòa | Nha Trang  |                        | cp20A | 12.3059 | 109.1767  |
| Liu BN1    | HAST | Vietnam | Bac Ninh  | Bắc Ninh   |                        | cp20A | 21.1673 | 106.0458  |
| Liu HN1    | HAST | Vietnam | Hà Nội    | Long Biên  |                        | cp20A | 21.0515 | 105.8970  |
| Liu HN2    | HAST | Vietnam | Hà Nội    | Từ Liêm    |                        | cp20A | 21.0811 | 105.7872  |
| Liu HN3    | HAST | Vietnam | Hà Nội    | Gia Lâm    |                        | cp20A | 21.0210 | 105.9377  |
| Liu HN4    | HAST | Vietnam | Hà Nội    | Long Biên  |                        | cp20A | 21.0247 | -74.0928  |

|               |      |         |             |             |  |       |         |          |
|---------------|------|---------|-------------|-------------|--|-------|---------|----------|
| Liu HN6       | HAST | Vietnam | Bắc Ninh    | Từ Sơn      |  | cp20A | 21.0990 | -74.0607 |
| Liu 130       | HAST | Vietnam | Khánh Hòa   | Nha Trang   |  | cp20D | 12.2937 | 109.1870 |
| Liu Viet117_1 | HAST | Vietnam | Hà Nội      | Cầu Giấy    |  | cp21D | 21.0457 | 105.7974 |
| Liu Viet117_2 | HAST | Vietnam | Hà Nội      | Cầu Giấy    |  | cp21D | 21.0457 | 105.7974 |
| Liu VietBL3   | HAST | Vietnam | Hà Nội      | Hà Đông     |  | cp21D | 20.9487 | 105.7467 |
| Liu VietHN5   | HAST | Vietnam | Hà Nội      | Gia Lâm     |  | cp21D | 21.0791 | -74.0907 |
| Liu VietHN5f  | HAST | Vietnam | Hà Nội      | Gia Lâm     |  | cp21D | 21.0791 | -74.0900 |
| Liu VietLL    | HAST | Vietnam | Hà Nội      | Long Biên   |  | cp21D | 21.0288 | -74.0880 |
| Liu VietNB    | HAST | Vietnam | Hà Nội      | Phú Cường   |  | cp21D | 21.2040 | -74.2205 |
| Liu 120_1     | HAST | Vietnam | Tuyên Quang | Tuyên Quang |  | cp34A | 20.2842 | 105.9066 |
| Liu 120_2     | HAST | Vietnam | Tuyên Quang | Tuyên Quang |  | cp34A | 21.8108 | 105.2145 |
| Liu 120_3     | HAST | Vietnam | Tuyên Quang | Tuyên Quang |  | cp34A | 21.8108 | 105.2145 |
| Liu 121_1     | HAST | Vietnam | Hoà Bình    | Mộc Châu    |  | cp34A | 21.8108 | 105.2145 |
| Liu 121_2     | HAST | Vietnam | Hoà Bình    | Mộc Châu    |  | cp34A | 20.7177 | 104.9894 |
| Liu 121_3     | HAST | Vietnam | Hoà Bình    | Mộc Châu    |  | cp34A | 20.7177 | 104.9894 |
| Liu 123_1     | HAST | Vietnam | Hai Phong   | Cát Bà      |  | cp34A | 20.8718 | 105.5187 |
| Liu 123_2     | HAST | Vietnam | Hai Phong   | Cát Bà      |  | cp34A | 20.7811 | 107.0117 |
| Liu 125       | HAST | Vietnam | Quảng Bình  | Bố Trạch    |  | cp34A | 20.7811 | 107.0117 |
| Liu 131_1     | HAST | Vietnam | Khánh Hòa   | Nha Trang   |  | cp34A | 12.3724 | 109.1924 |
| Liu BL1       | HAST | Vietnam | Hà Nội      | Hà Đông     |  | cp34A | 20.9506 | 105.7490 |
| Liu BL2       | HAST | Vietnam | Hà Nội      | Hà Đông     |  | cp34A | 20.9499 | 105.7488 |
| Liu BN3       | HAST | Vietnam | Bac Ninh    | Bắc Ninh    |  | cp34A | 21.1534 | 106.0325 |
| Liu TX1       | HAST | Vietnam | Hà Nội      | Thanh Xuân  |  | cp34A | 20.9950 | 105.8086 |
| Liu TX2       | HAST | Vietnam | Hà Nội      | Thanh Xuân  |  | cp34A | 20.9955 | 105.8085 |
| Liu 128_1     | HAST | Vietnam | Khánh Hòa   | Diên Khánh  |  | cp34B | 12.1203 | 109.1088 |
| Liu 122       | HAST | Vietnam | Hoà Bình    | Mộc Châu    |  | cp34C | 20.7177 | 104.9894 |
| Liu BN2       | HAST | Vietnam | Bac Ninh    | Bắc Ninh    |  | cp34C | 21.1653 | 106.0440 |
| Liu 118       | HAST | Vietnam | Hà Nội      | Hoàn Kiếm   |  | cp35  | 21.0457 | 105.7974 |
| Liu XM1       | HAST | Vietnam | Hà Nội      | Chương Mỹ   |  | cp35  | 20.9042 | -74.4117 |
| Liu XM2       | HAST | Vietnam | Hà Nội      | Chương Mỹ   |  | cp35  | 20.9048 | -74.4107 |
| Liu 119_2     | HAST | Vietnam | Ninh Bình   | Hoa Lư      |  | cp39B | 20.2842 | 105.9066 |
